# Supplementary material for: Spatial and vertical extent of nucleation events in the Midwestern USA: insights from the Nucleation In ForesTs (NIFTy) experiment
Source: Copernicus journal article supplement (doi:10.5194/acp-11-1641-2011), 2011-02-21
Supplement: Supplementary file 1 [file acp-11-1641-2011-supplement.pdf]

1 **Supplemental materials to: Spatial and vertical extent of**  
2 **nucleation events in the Midwestern USA: Insights from**  
3 **the Nucleation In Forests (NIFTy) experiment**

4  
5 **S. C. Pryor<sup>1</sup>, R. J. Barthelmie<sup>1</sup>, L. L. Sørensen<sup>2</sup>, J. G. McGrath<sup>3</sup>, P. Hopke<sup>4</sup>, T.**  
6 **Petäjä<sup>5</sup>**

7 [1]{Atmospheric Science Program, College of Arts and Sciences, Indiana University,  
8 Bloomington, IN 47405, USA}

9 [2]{Department of Atmospheric Environment, Aarhus University, Roskilde, Denmark}

10 [3]{School of Physics, NUI Galway, Galway, Ireland}

11 [4] {Chemical and Biomolecular Engineering, Clarkson University, Postdam, NY 13699}

12 [5] {Department of Physics, University of Helsinki, Helsinki, Finland}

13 Correspondence to: S. C. Pryor (spryor@indiana.edu)

14

1 **1 Event classification**

2 Data from all four aerosol particle sizing instruments operated during NIFTy were analyzed  
3 to determine event frequency and characteristics based on a subjective classification protocol  
4 (Dal Maso et al., 2005; Boy and Kulmala, 2002):

- 5 • Event class A: Formation of an aerosol particle mode (with a number geometric mean  
6 diameter (nGMD) below 25 nm) which subsequently exhibits clear and sustained growth.
- 7 • Event class B: Formation of a new aerosol particle mode but it was not visible at the  
8 lowest aerosol particle sizes considered. Some growth was observed, but was not  
9 continuous, thus determining a growth rate was difficult.
- 10 • Event class C: Increased ultra-fine aerosol particle concentrations were observed but the  
11 mode did not exhibit clear and sustained growth.

12 All days for which valid data were collected that did not meet these criteria were allocated to  
13 a non-event class.

1 **2 Detailed chemical and physical time series at MMSF on two event days.**

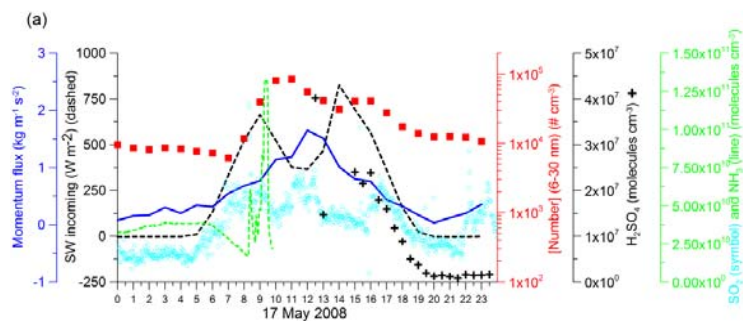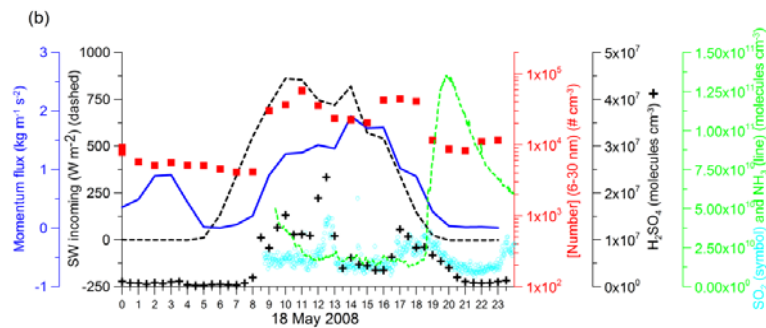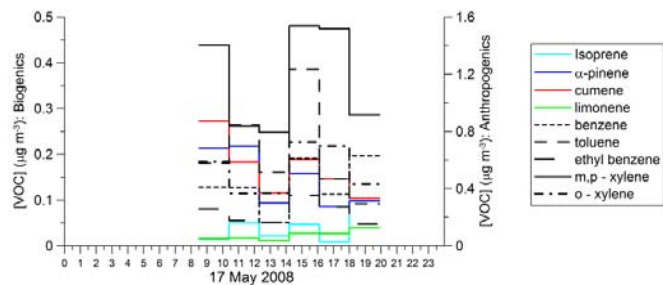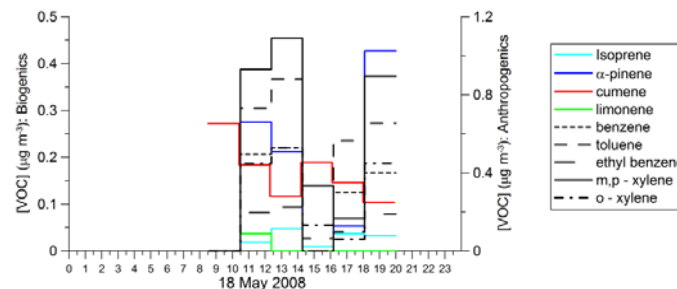

2  
3  
4 Figure S1. Upper frames: Time series of the momentum flux (used as a metric of turbulence intensity), incoming shortwave radiation, ultrafine  
5 aerosol particle number concentration ( $D_p = 6$  to  $30$  nm), sulfuric acid ( $H_2SO_4$ ), ammonia ( $NH_3$ ), sulfur dioxide ( $SO_2$ ) at MMSF during (a) 17  
6 May, and (b) 18 May 2008. Both days were characterized by double-peak nucleation events (see main text Fig. 4 for the size distributions). The  
7 lower frames show the speciated 2-hour average VOC concentrations on those days. In the lower frames the concentration of VOCs that are  
8 principally of biogenic origin is shown on the left-hand axis while those of predominantly anthropogenic origin are shown on the right-hand axis.

### 3 Condensational sink and Nucleation parameter values and comparison 2 with data from Hyytiälä

3 Average NP values at MMSF are higher on event than non-event days (Fig. S2), and are  
4 higher than NP values at Hyytiälä on event days. When NP is computed for Hyytiälä using a  
5 wavelength specific radiative flux (UV-A), new aerosol particle formation in April and May  
6 only initiated when  $NP > 2.7 \times 10^{-25} \text{ W m molecules}^{-1} \text{ K}^{-1}$ . Scaling the threshold of  $NP >$   
7  $2.7 \times 10^{-25} \text{ W m molecules}^{-1} \text{ K}^{-1}$  for Hyytiälä (Boy and Kulmala, 2002) by a factor of 17 (to  
8 convert a radiative flux in the UV-A band to total down-welling shortwave radiation  
9 (Johnson et al., 1976)) gives  $4.6 \times 10^{-24} \text{ W m molecules}^{-1} \text{ K}^{-1}$  which is a factor of six lower  
10 than the threshold of  $3.0 \times 10^{-23} \text{ W m molecules}^{-1} \text{ K}^{-1}$  implied by data from MMSF. This  
11 discrepancy may be due to variations in the relationship between shortwave and UV-A that  
12 derive from factors such as cloud cover, aerosol optical depth and water vapor (Grant et al.,  
13 1996), but it may also reflect either the higher condensational sink at MMSF which means a  
14 higher NP is needed for larger production of  $\text{H}_2\text{SO}_4$  (from  $\text{SO}_2$ ), or that a larger radiative flux  
15 is required to destabilize the atmosphere at MMSF.

16

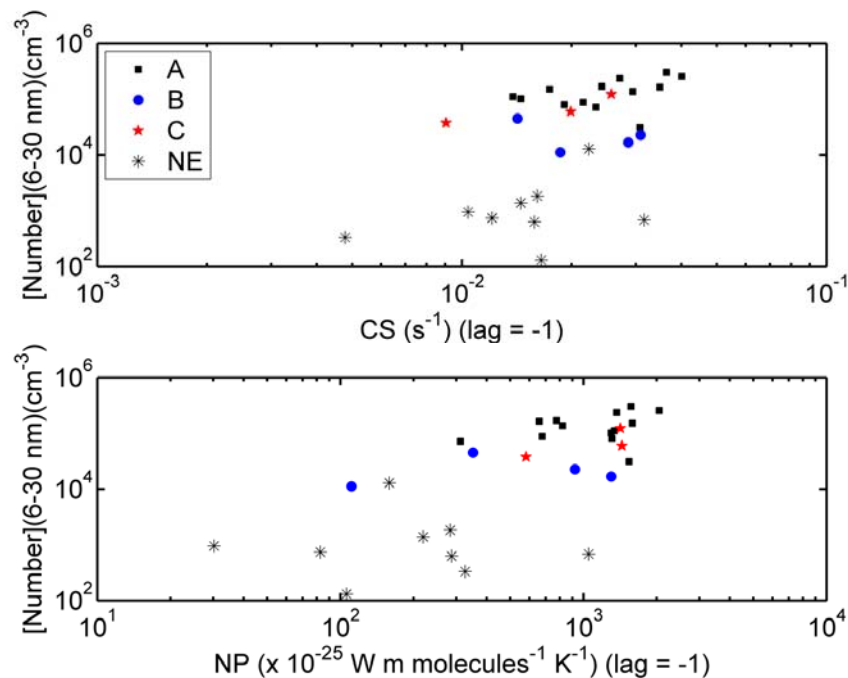

1

2 Figure S2. Scatterplots of the (a) condensational sink (CS) and (b) the nucleation parameter  
 3 (NP) of Boy and Kulmala (2002) versus number concentration of aerosol particles with  $D_p =$   
 4 6 - 30 nm at MMSF during 1-31 May 2008 conditionally sampled by event class. Note CS  
 5 and NP were computed for one-hour prior to the aerosol particle number concentration  
 6 maximum on event days and at 11:00-12:00 (LST) for non-event days. The aerosol particle  
 7 number concentration (for  $D_p = 3$  to 30 nm) is computed for the hour of highest total aerosol  
 8 particle concentrations at 46 m on event days and for 12:00-13:00 LST on non-event days.

9

#### 1 **4 Assessing the role of VOCs**

2 It has been proposed that oxidation products of monoterpenes and other VOCs may be  
3 directly involved in aerosol particle nucleation or stabilization of nuclei clusters (Bonn et al.,  
4 2009). Thus we examined the relationship between possible production of low-volatility  
5 condensable products from the measured VOCs and the concentration of ultrafine aerosol  
6 particle concentrations for all days when ultrafine aerosol particle concentrations and H<sub>2</sub>SO<sub>4</sub>  
7 or the VOC concentrations are available. This analysis assumes the measured VOCs are  
8 adequate indicators of the gases that will be oxidized to generate potentially nucleating gases,  
9 and that Fractional Aerosol Coefficients (FAC) adequately represent production of low  
10 volatility vapors, and thus must be viewed with caution. Each of the measured VOC  
11 (isoprene,  $\alpha$ -pinene, limonene, cumene (isopropylbenzene), benzene, toluene, ethyl benzene,  
12 o-, m-, and p-xylene) was ascribed both a FAC that described the fraction of the compound  
13 that has the potential to be oxidized to a condensable vapor and a reacted fraction that  
14 describes the fraction that can be oxidized based on its reaction rate with the hydroxyl radical  
15 (see Table S1 for the values used). It is acknowledged that this approach neglects the  
16 availability of oxidants and the relationship with condensed mass (Griffin et al., 2003), but is  
17 applied here to broadly represent the potential for the production of oxidation products with  
18 low volatility that might participate either in nucleation or condensation. Total condensable  
19 mass from FAC and the fractions from biogenic and anthropogenic gases as measured during  
20 the morning hours (09:00 to 13:00 LST) exhibit a weak negative correlation with ultrafine  
21 aerosol particle concentrations (Fig. S3), while mean morning H<sub>2</sub>SO<sub>4</sub> (computed for the same  
22 time period as the VOCs) indicates a relatively strong positive relationship with the  
23 maximum aerosol particle number concentration ( $r^2 = 0.5$  for a power law fit). This implies  
24 nucleation occurrence and particle production rates are much more strongly related to H<sub>2</sub>SO<sub>4</sub>  
25 than VOC concentrations or low volatility oxidation products there from.

1 Table S1. The FAC and reacted fraction values used in analysis of the VOCs. The values  
 2 shown are taken from (Grosjean, 1992) except for isoprene for which the FAC is from (Lu et  
 3 al., 2009) and the reacted fraction is assumed to be an average of the other biogenics.

|                            | Fraction aerosol coefficient (%) | Reacted fraction |
|----------------------------|----------------------------------|------------------|
| Isoprene                   | 2                                | 0.33             |
| $\alpha$ -pinene           | 30                               | 1                |
| cumene (isopropyl benzene) | 4                                | 0.13             |
| Limonene                   | 3                                | 0.12             |
| Benzene                    | 0                                | 0                |
| Toluene                    | 5.4                              | 0.12             |
| Ethyl benzene              | 5.4                              | 0.15             |
| (m,p)-xylene (average)     | 3.5                              | 0.34             |
| o-xylene                   | 5                                | 0.26             |

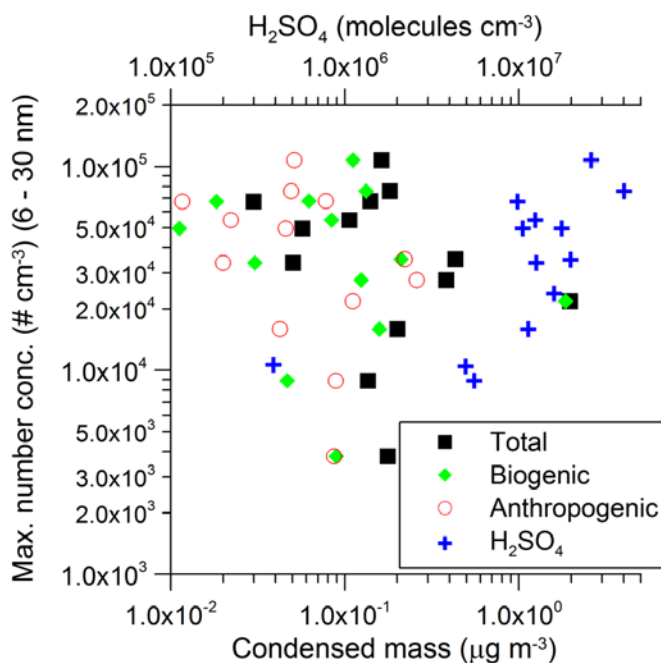

4  
 5 Figure S3. Daily maximum ultrafine aerosol particle number concentration plotted as a  
 6 function of FAC derived condensed mass from the morning VOC concentrations (i.e. derived  
 7 from the sum of the VOC concentrations in the 09:00-11:00 and 11:00-13:00 (LST) samples).  
 8 Also shown is the relationship between the daily maximum aerosol particle number  
 9 concentration and mean morning  $H_2SO_4$  concentrations (computed as the average of the  
 10 observations from 09:00-13:00 (LST)).

## 1 **5 References**

- 2 Bonn, B., Boy, M., Kulmala, M., Groth, A., Trawny, K., Borchert, S., and Jacobi, S.: A new  
3 parametrization for ambient particle formation over coniferous forests and its potential  
4 implications for the future, *Atmospheric Chemistry and Physics*, 9, 8079-8090, 2009.
- 5 Boy, M., and Kulmala, M.: Nucleation events in the continental boundary layer: Influence of  
6 physical and meteorological parameters, *Atmospheric Chemistry and Physics*, 2, 1-16, 2002.
- 7 Dal Maso, M., Kulmala, M., Riipinen, I., Wagner, R., Hussein, T., Aalto, P. P., and Lehtinen,  
8 K. E. J.: Formation and growth of fresh atmospheric aerosols: eight years of aerosol size  
9 distribution data from SMEAR II, Hyytiälä, Finland, *Boreal Environment Research*, 10, 323-  
10 336, 2005.
- 11 Grant, R. H., Heisler, G. M., and Gao, W.: Photosynthetically active radiation: sky radiance  
12 distributions under clear and overcast conditions, *Agricultural and Forest Meteorology*, 82,  
13 267-292, 1996.
- 14 Griffin, R., Nguyen, K., Dabdub, D., and Seinfeld, J.: A coupled hydrophobic-hydrophilic  
15 model for predicting secondary organic aerosol formation, *Journal of Atmospheric*  
16 *Chemistry*, 44, 171-190, 2003.
- 17 Grosjean, D.: In situ organic aerosol formation during a smog episode: estimated production  
18 and chemical functionality, *Atmospheric Environment*, 26A, 953-963, 1992.
- 19 Johnson, F. S., Mo, T., and Green, A. E. S.: Average latitudinal variation in ultraviolet  
20 radiation at Earth's surface, *Photochemistry and Photobiology*, 23, 179-188, 1976.
- 21 Lu, Z.-F., Hao, J. M., Duan, J. C., and Li, J. H.: Estimate of the formation potential of organic  
22 aerosol in Beijing summertime, *Environmental Science*, 30, 969-975, 2009.
